# Supplementary material for: The Distribution and ‘In Vivo’ Phase Variation Status of Haemoglobin Receptors in Invasive Meningococcal Serogroup B Disease: Genotypic and Phenotypic Analysis
Source: PubMed Central journal article supplement (PMC3786947; doi:10.1371/journal.pone.0076932), 2013-09-30
Supplement: pone.0076932.s001.pdf [file pone.0076932.s001.pdf]

## Isolate DNA

Detection of respective gene by PCR amplification of homopolymeric tract and closely flanking regions using proximal, intragenically directed primers<sup>a</sup>.

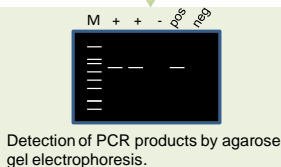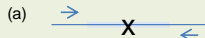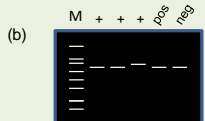

Confirm absence of genes by (a) PCR amplification of corresponding locus using externally directed primers<sup>d</sup> (*hpuA*) or intragenically targeted primers against *exl3*<sup>e</sup> (*hmbR*) and (b) detection of products by agarose gel electrophoresis.

## Specimen DNA

'Round 1' PCR amplification of homopolymeric tract and flanking regions using remote, intragenically directed primers<sup>b</sup>.

'Round 2' (nested) PCR amplification of homopolymeric tract and closely flanking regions using 'round 1' PCR product as a template in conjunction with intermediate, intragenically directed primers<sup>c</sup>.

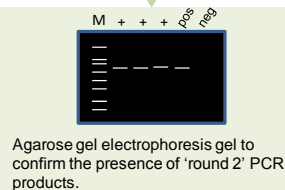

Sequence analysis of PCR products (using proximal PCR primers<sup>a</sup>) to characterise homopolymeric tract and flanking regions. The illustrated tract possessed nine G repeats.

PCR amplification of homopolymeric tract and flanking regions using genomic DNA or 'Round 1' PCR products as template in conjunction with proximal FAM-labelled primers<sup>a</sup>.

Fragment analysis of FAM-labelled PCR products (blue peak) against a GeneScan 500 LIZ size standard (orange peaks) to enable quantitation of homopolymeric tract length.

Key:

Thin blue line = DNA flanking the respective gene.  
Thick blue line = *hmbR* or *hpuA*.  
Yellow block = homopolymeric tract.  
Arrows = primers.
