# Supplementary material for: The Distribution and ‘In Vivo’ Phase Variation Status of Haemoglobin Receptors in Invasive Meningococcal Serogroup B Disease: Genotypic and Phenotypic Analysis
Source: PubMed Central journal article supplement (PMC3786947; doi:10.1371/journal.pone.0076932), 2013-09-30

(a)

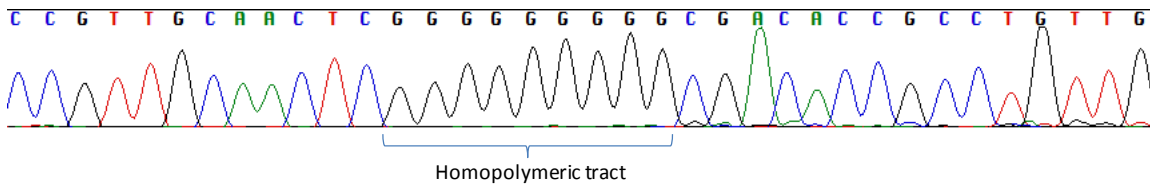

(b)

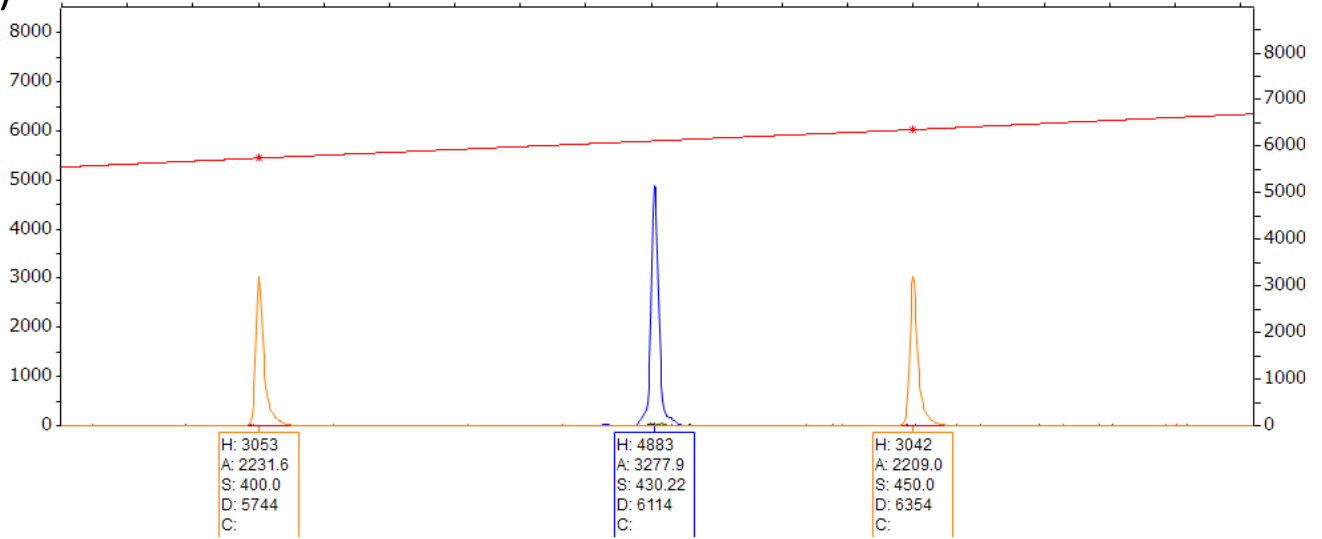

(c)

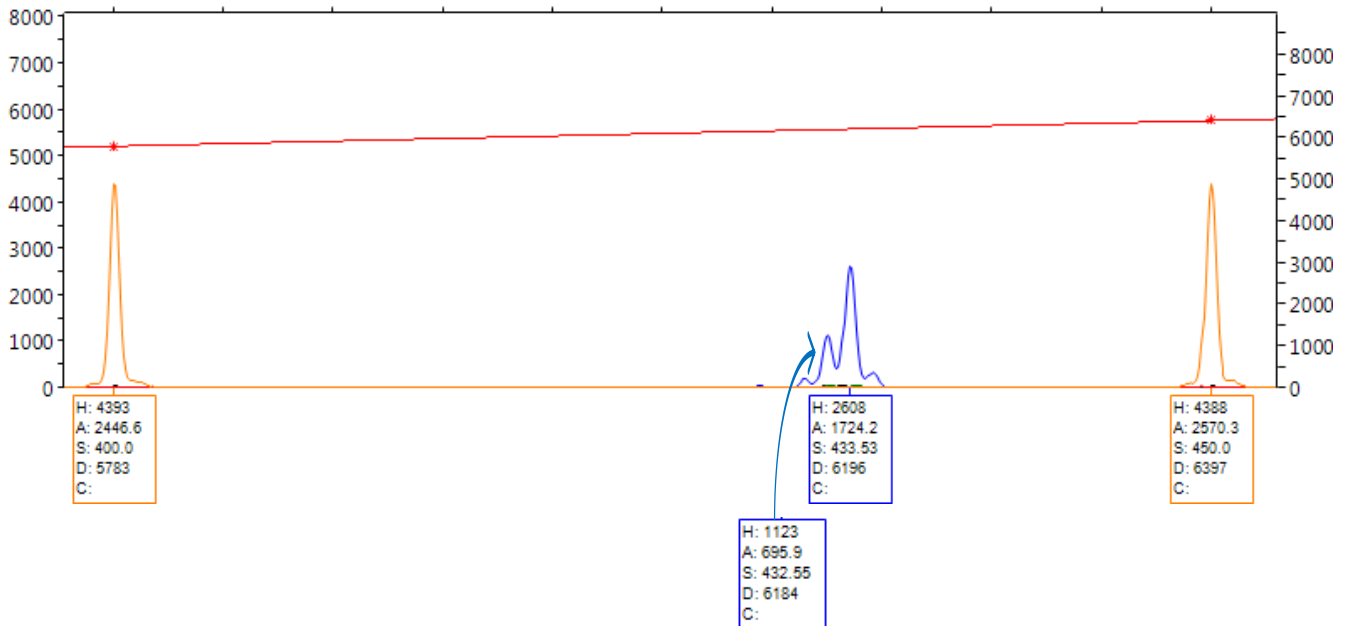

Supplement: pone.0076932.s002.pdf [file pone.0076932.s002.pdf]
