# Supplementary material for: The Distribution and ‘In Vivo’ Phase Variation Status of Haemoglobin Receptors in Invasive Meningococcal Serogroup B Disease: Genotypic and Phenotypic Analysis
Source: PubMed Central journal article supplement (PMC3786947; doi:10.1371/journal.pone.0076932), 2013-09-30

MH agar

MH agar + desferal

supplement

Hb

Tf

H<sub>2</sub>O

i10

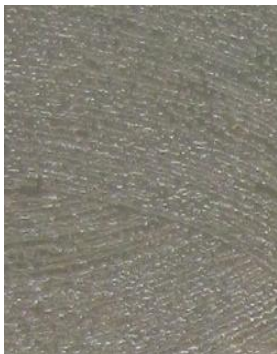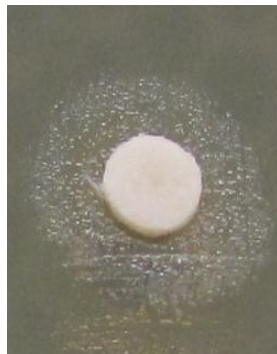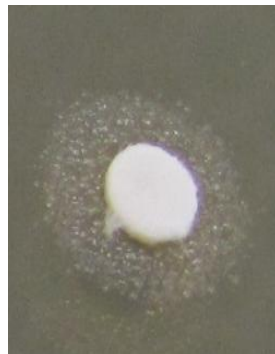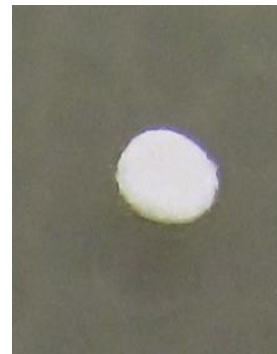

isolate

i106

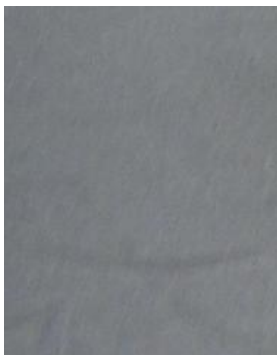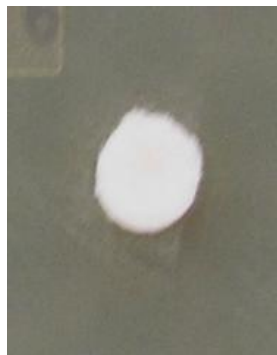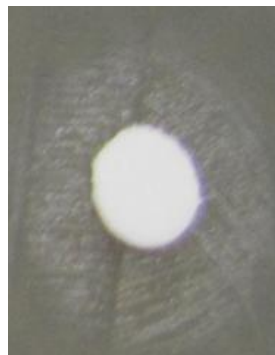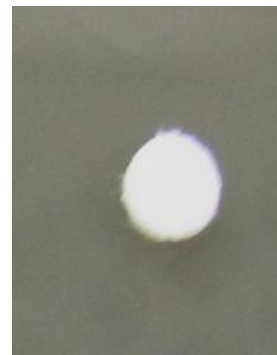

Supplement: pone.0076932.s003.pdf [file pone.0076932.s003.pdf]
