# Supplementary material for: The Distribution and ‘In Vivo’ Phase Variation Status of Haemoglobin Receptors in Invasive Meningococcal Serogroup B Disease: Genotypic and Phenotypic Analysis
Source: PubMed Central journal article supplement (PMC3786947; doi:10.1371/journal.pone.0076932), 2013-09-30
Supplement: pone.0076932.s004.pdf [file pone.0076932.s004.pdf]

**Table S1.** Genotypic and phenotypic phase variation status of *hmbR* and *hpuA* among a representative panel of English, Welsh and Northern Irish invasive serogroup B meningococcal isolates and their corresponding clinical specimens.

| Isolate/<br>specimen | Isolate/<br>genome<br>id <sup>g</sup> | Sequence<br>type | Clonal<br>complex<br>(cluster <sup>f</sup> ) | Specimen | PV status                                                                                 |               |                            |                            |                                                        |             |
|----------------------|---------------------------------------|------------------|----------------------------------------------|----------|-------------------------------------------------------------------------------------------|---------------|----------------------------|----------------------------|--------------------------------------------------------|-------------|
|                      |                                       |                  |                                              |          | Isolates                                                                                  |               |                            |                            | Specimens (genotypic, versus<br>corresponding isolate) |             |
|                      |                                       |                  |                                              |          | Genotypic (effective homopolymeric tract<br>length/absolute tract length where different) |               |                            | Phenotypic <sup>b</sup>    | <i>hmbR</i>                                            | <i>hpuA</i> |
|                      |                                       |                  |                                              |          | <i>hmbR</i>                                                                               | <i>hpuA</i>   | Overall <sup>a</sup>       |                            |                                                        |             |
| i1/s1                | <a href="#">20066</a>                 | 11               | 11                                           | Blood    | ON (9)                                                                                    | ON (10)       | on                         | on                         | same                                                   | same        |
| i2/s2                | <a href="#">20215</a>                 | 11               | 11                                           | CSF      | ON (12)                                                                                   | ON (10)       | on                         | on                         | same                                                   | same        |
| i28/s28              | <a href="#">20765</a>                 | 9328             | 18                                           | Blood    | ON (9)                                                                                    | OFF (6)       | on                         | indeterminate <sup>d</sup> | same                                                   | same        |
| i5/s5                | <a href="#">20297</a>                 | 32               | 32                                           | Blood    | OFF (10)                                                                                  | ON (13)       | on                         | on                         | same                                                   | same        |
| i88/s88              | <a href="#">20740</a>                 | 32               | 32                                           | Plasma   | ON (15)                                                                                   | <i>n/a</i>    | on                         | on                         | same                                                   | <i>n/a</i>  |
| i89/s89              | <a href="#">20747</a>                 | 33               | 32                                           | Blood    | ON (9)                                                                                    | <i>n/a</i>    | on                         | on                         | same                                                   | <i>n/a</i>  |
| i6/s6                | <a href="#">20139</a>                 | 259              | 32                                           | Blood    | ON (12)                                                                                   | <i>n/a</i>    | on                         | on                         | same                                                   | <i>n/a</i>  |
| i7/s7                | <a href="#">20772</a>                 | 749              | 32                                           | Blood    | OFF (10)                                                                                  | <i>n/a</i>    | off                        | off                        | same                                                   | <i>n/a</i>  |
| i4/s4                | <a href="#">20789</a>                 | 2503             | 32                                           | Plasma   | OFF (11/9)                                                                                | <i>n/a</i>    | off                        | off                        | same                                                   | <i>n/a</i>  |
| i90/s90              | <a href="#">20739</a>                 | 35               | 35                                           | Blood    | OFF (8)                                                                                   | ON (12/13)    | off                        | off                        | same                                                   | same        |
| i15/s15              | <a href="#">20790</a>                 | 60               | 60                                           | Blood    | OFF (10)                                                                                  | indeterminate | Indeterminate <sup>c</sup> | Indeterminate <sup>d</sup> | same                                                   | same        |
| i91/s91              | <a href="#">20741</a>                 | 7788             | 60                                           | Blood    | OFF (7)                                                                                   | OFF (11/12)   | off                        | off                        | same                                                   | same        |
| i19/s19              | <a href="#">20287</a>                 | 9327             | 60                                           | Blood    | OFF (8)                                                                                   | ON (13/14)    | on                         | on                         | same                                                   | same        |
| i13/s13              | <a href="#">20248</a>                 | 9239             | 103                                          | Blood    | OFF (11)                                                                                  | ON (10)       | on                         | on                         | same                                                   | same        |
| i583/s62             | <a href="#">20804</a>                 | 162              | 162                                          | Blood    | OFF (8)                                                                                   | ON (10)       | on                         | on                         | same                                                   | same        |
| i22/s22              | <a href="#">20794</a>                 | 162              | 162                                          | Blood    | OFF (8)                                                                                   | ON (13)       | on                         | on                         | same                                                   | same        |
| i63/s63              | <a href="#">20756</a>                 | 162              | 162                                          | Blood    | OFF (8)                                                                                   | ON (13)       | on                         | on                         | same                                                   | same        |
| i21/s21              | <a href="#">20786</a>                 | 8383             | 162                                          | Blood    | ON (9)                                                                                    | ON (10)       | on                         | on                         | same                                                   | same        |
| i23/s23              | <a href="#">20797</a>                 | 213              | 213                                          | Blood    | OFF (7)                                                                                   | <i>n/a</i>    | off                        | off                        | same                                                   | <i>n/a</i>  |
| i26/s26              | <a href="#">20759</a>                 | 213              | 213                                          | Blood    | ON (9)                                                                                    | <i>n/a</i>    | on                         | on                         | same                                                   | <i>n/a</i>  |

| Isolate/<br>specimen | Isolate/<br>genome<br>id <sup>g</sup> | Sequence<br>type | Clonal<br>complex<br>(cluster <sup>f</sup> ) | Specimen | PV status                                                                                 |             |                      |                            |                                                        |             |
|----------------------|---------------------------------------|------------------|----------------------------------------------|----------|-------------------------------------------------------------------------------------------|-------------|----------------------|----------------------------|--------------------------------------------------------|-------------|
|                      |                                       |                  |                                              |          | Isolates                                                                                  |             |                      |                            | Specimens (genotypic, versus<br>corresponding isolate) |             |
|                      |                                       |                  |                                              |          | Genotypic (effective homopolymeric tract<br>length/absolute tract length where different) |             |                      | Phenotypic <sup>b</sup>    | <i>hmbR</i>                                            | <i>hpuA</i> |
|                      |                                       |                  |                                              |          | <i>hmbR</i>                                                                               | <i>hpuA</i> | Overall <sup>a</sup> |                            |                                                        |             |
| i29/s29              | <a href="#">20769</a>                 | 213              | 213                                          | Blood    | OFF (10)                                                                                  | <i>n/a</i>  | off                  | off                        | same                                                   | <i>n/a</i>  |
| i31/s31              | <a href="#">20771</a>                 | 213              | 213                                          | Blood    | ON (9)                                                                                    | <i>n/a</i>  | on                   | on                         | same                                                   | <i>n/a</i>  |
| i27/s27              | <a href="#">20763</a>                 | 2388             | 213                                          | Serum    | ON (9)                                                                                    | <i>n/a</i>  | on                   | on                         | same                                                   | <i>n/a</i>  |
| i48/s48              | <a href="#">20793</a>                 | 461              | 461                                          | Blood    | OFF (13)                                                                                  | <i>n/a</i>  | off                  | off                        | same                                                   | <i>n/a</i>  |
| i55/s55              | <a href="#">20753</a>                 | 461              | 461                                          | Blood    | ON (15)                                                                                   | <i>n/a</i>  | on                   | on                         | indeterminate <sup>e</sup>                             | <i>n/a</i>  |
| i60/s60              | <a href="#">20780</a>                 | 1157             | 1157                                         | Blood    | <i>n/a</i>                                                                                | ON (10/11)  | on                   | on                         | <i>n/a</i>                                             | same        |
| i61/s61              | <a href="#">20035</a>                 | 1157             | 1157                                         | CSF      | ON (9)                                                                                    | ON (13/14)  | on                   | on                         | same                                                   | same        |
| i59/s59              | <a href="#">20777</a>                 | 3149             | 1157                                         | CSF      | ON (9)                                                                                    | OFF (9/10)  | on                   | on                         | same                                                   | same        |
| i9/s9                | <a href="#">20775</a>                 | 13               | 269 (269)                                    | Blood    | OFF (11)                                                                                  | OFF (9)     | off                  | off                        | same                                                   | same        |
| i32/s32              | <a href="#">20808</a>                 | 269              | 269 (269)                                    | Blood    | ON (9)                                                                                    | <i>n/a</i>  | on                   | indeterminate <sup>d</sup> | same                                                   | <i>n/a</i>  |
| i35/s35              | <a href="#">20752</a>                 | 269              | 269 (269)                                    | Blood    | ON (9)                                                                                    | <i>n/a</i>  | on                   | indeterminate <sup>d</sup> | same                                                   | <i>n/a</i>  |
| i39/s39              | <a href="#">20807</a>                 | 269              | 269 (269)                                    | Blood    | ON (9)                                                                                    | <i>n/a</i>  | on                   | on                         | same                                                   | <i>n/a</i>  |
| i40/s40              | <a href="#">20774</a>                 | 269              | 269 (269)                                    | Blood    | ON (9)                                                                                    | <i>n/a</i>  | on                   | Indeterminate <sup>d</sup> | same                                                   | <i>n/a</i>  |
| i41/s41              | <a href="#">20778</a>                 | 269              | 269 (269)                                    | Blood    | OFF (10)                                                                                  | <i>n/a</i>  | off                  | off                        | same                                                   | <i>n/a</i>  |
| i42/s42              | <a href="#">20767</a>                 | 269              | 269 (269)                                    | CSF      | OFF (8)                                                                                   | <i>n/a</i>  | off                  | off                        | same                                                   | <i>n/a</i>  |
| i96/s96              | <a href="#">20744</a>                 | 269              | 269 (269)                                    | CSF      | OFF (8)                                                                                   | <i>n/a</i>  | off                  | off                        | same                                                   | <i>n/a</i>  |
| i18/s18              | <a href="#">20119</a>                 | 479              | 269 (269)                                    | Blood    | ON (9)                                                                                    | <i>n/a</i>  | on                   | on                         | same                                                   | <i>n/a</i>  |
| i37/s37              | <a href="#">20806</a>                 | 1214             | 269 (269)                                    | Blood    | ON (9)                                                                                    | <i>n/a</i>  | on                   | on                         | same                                                   | <i>n/a</i>  |
| i36/s36              | <a href="#">20754</a>                 | 9240             | 269 (269)                                    | Blood    | ON (9)                                                                                    | <i>n/a</i>  | on                   | indeterminate <sup>d</sup> | no product                                             | <i>n/a</i>  |
| i92/s92              | <a href="#">20784</a>                 | 275              | 269 (275)                                    | Blood    | ON (9)                                                                                    | OFF (9)     | on                   | on                         | same                                                   | same        |
| i95/s95              | <a href="#">20743</a>                 | 275              | 269 (275)                                    | Blood    | <i>n/a</i>                                                                                | ON (10)     | on                   | on                         | <i>n/a</i>                                             | same        |
| i97/s97              | <a href="#">20745</a>                 | 275              | 269 (275)                                    | Blood    | OFF (8)                                                                                   | ON (10)     | on                   | on                         | same                                                   | same        |

| Isolate/<br>specimen | Isolate/<br>genome<br>id <sup>g</sup> | Sequence<br>type | Clonal<br>complex<br>(cluster <sup>f</sup> ) | Specimen | PV status                                                                                 |             |                      |                            |                                                        |             |
|----------------------|---------------------------------------|------------------|----------------------------------------------|----------|-------------------------------------------------------------------------------------------|-------------|----------------------|----------------------------|--------------------------------------------------------|-------------|
|                      |                                       |                  |                                              |          | Isolates                                                                                  |             |                      |                            | Specimens (genotypic, versus<br>corresponding isolate) |             |
|                      |                                       |                  |                                              |          | Genotypic (effective homopolymeric tract<br>length/absolute tract length where different) |             |                      | Phenotypic <sup>b</sup>    | <i>hmbR</i>                                            | <i>hpuA</i> |
|                      |                                       |                  |                                              |          | <i>hmbR</i>                                                                               | <i>hpuA</i> | Overall <sup>a</sup> |                            |                                                        |             |
| i45/s45              | <a href="#">20779</a>                 | 1161             | 269 (275)                                    | Blood    | ON (9)                                                                                    | ON (4)      | on                   | on                         | same                                                   | same        |
| i46/s46              | <a href="#">20783</a>                 | 1161             | 269 (275)                                    | Blood    | OFF (10)                                                                                  | OFF (9)     | off                  | off                        | no product                                             | no product  |
| i47/s47              | <a href="#">20787</a>                 | 1161             | 269 (275)                                    | Blood    | OFF (8)                                                                                   | ON (10)     | on                   | on                         | same                                                   | same        |
| i50/s50              | <a href="#">20796</a>                 | 1161             | 269 (275)                                    | Blood    | OFF (10)                                                                                  | ON (13)     | on                   | on                         | same                                                   | same        |
| i98/s98              | <a href="#">20737</a>                 | 1161             | 269 (275)                                    | Blood    | OFF (10)                                                                                  | ON (13)     | on                   | on                         | same                                                   | same        |
| i11/s11              | <a href="#">19986</a>                 | 1163             | 269 (275)                                    | Blood    | ON (9)                                                                                    | ON (10/9)   | on                   | on                         | same                                                   | same        |
| i53/s53              | <a href="#">20751</a>                 | 1991             | 269 (275)                                    | Blood    | ON (9)                                                                                    | OFF (8)     | on                   | on                         | same                                                   | same        |
| i52/s52              | <a href="#">20750</a>                 | 9242             | 269 (275)                                    | Blood    | OFF (10)                                                                                  | OFF (9)     | off                  | off                        | same                                                   | same        |
| i105/s105            | <a href="#">20742</a>                 | 41               | 41/44                                        | Serum    | ON (9)                                                                                    | <i>n/a</i>  | on                   | on                         | same                                                   | <i>n/a</i>  |
| i106/s106            | <a href="#">20748</a>                 | 41               | 41/44                                        | CSF      | OFF (8)                                                                                   | <i>n/a</i>  | off                  | off                        | same                                                   | <i>n/a</i>  |
| i14/s14              | <a href="#">20788</a>                 | 41               | 41/44                                        | Blood    | ON (9)                                                                                    | <i>n/a</i>  | on                   | on                         | same                                                   | <i>n/a</i>  |
| i30/s30              | <a href="#">20770</a>                 | 41               | 41/44                                        | CSF      | ON (9)                                                                                    | <i>n/a</i>  | on                   | on                         | same                                                   | <i>n/a</i>  |
| i70/s70              | <a href="#">20781</a>                 | 41               | 41/44                                        | Blood    | OFF (8)                                                                                   | ON (13)     | on                   | on                         | same                                                   | same        |
| i81/s81              | <a href="#">20755</a>                 | 41               | 41/44                                        | Blood    | OFF (8)                                                                                   | <i>n/a</i>  | off                  | Indeterminate <sup>d</sup> | same                                                   | <i>n/a</i>  |
| i85/s85              | <a href="#">20762</a>                 | 41               | 41/44                                        | Blood    | ON (9)                                                                                    | <i>n/a</i>  | on                   | Indeterminate <sup>d</sup> | same                                                   | <i>n/a</i>  |
| i75/s75              | <a href="#">20798</a>                 | 154              | 41/44                                        | Blood    | ON (9)                                                                                    | <i>n/a</i>  | on                   | on                         | same                                                   | <i>n/a</i>  |
| i74/s74              | <a href="#">20795</a>                 | 303              | 41/44                                        | Blood    | ON (9)                                                                                    | <i>n/a</i>  | on                   | on                         | same                                                   | <i>n/a</i>  |
| i25/s25              | <a href="#">20758</a>                 | 318              | 41/44                                        | Blood    | ON (9)                                                                                    | <i>n/a</i>  | on                   | on                         | same                                                   | <i>n/a</i>  |
| i77/s77              | <a href="#">20802</a>                 | 340              | 41/44                                        | Blood    | ON (9)                                                                                    | <i>n/a</i>  | on                   | on                         | same                                                   | <i>n/a</i>  |
| i86/s86              | <a href="#">20764</a>                 | 340              | 41/44                                        | Blood    | ON (9)                                                                                    | <i>n/a</i>  | on                   | on                         | same                                                   | <i>n/a</i>  |
| i16/s16              | <a href="#">20766</a>                 | 839              | 41/44                                        | Blood    | ON (9)                                                                                    | <i>n/a</i>  | on                   | on                         | same                                                   | <i>n/a</i>  |
| i101/s101            | <a href="#">20738</a>                 | 1194             | 41/44                                        | Blood    | ON (9)                                                                                    | <i>n/a</i>  | on                   | on                         | same                                                   | <i>n/a</i>  |

| Isolate/<br>specimen | Isolate/<br>genome<br>id <sup>g</sup> | Sequence<br>type | Clonal<br>complex<br>(cluster <sup>f</sup> ) | Specimen | PV status                                                                                 |             |                      |                            |                                                        |                            |
|----------------------|---------------------------------------|------------------|----------------------------------------------|----------|-------------------------------------------------------------------------------------------|-------------|----------------------|----------------------------|--------------------------------------------------------|----------------------------|
|                      |                                       |                  |                                              |          | Isolates                                                                                  |             |                      |                            | Specimens (genotypic, versus<br>corresponding isolate) |                            |
|                      |                                       |                  |                                              |          | Genotypic (effective homopolymeric tract<br>length/absolute tract length where different) |             |                      | Phenotypic <sup>b</sup>    | <i>hmbR</i>                                            | <i>hpuA</i>                |
|                      |                                       |                  |                                              |          | <i>hmbR</i>                                                                               | <i>hpuA</i> | Overall <sup>a</sup> |                            |                                                        |                            |
| i69/s69              | <a href="#">20809</a>                 | 1788             | 41/44                                        | Blood    | ON (6)                                                                                    | <i>n/a</i>  | on                   | Indeterminate <sup>d</sup> | same                                                   | <i>n/a</i>                 |
| i73/s73              | <a href="#">20792</a>                 | 3754             | 41/44                                        | Blood    | ON (9)                                                                                    | <i>n/a</i>  | on                   | on                         | same                                                   | <i>n/a</i>                 |
| i82/s82              | <a href="#">20757</a>                 | 4100             | 41/44                                        | Blood    | ON (9)                                                                                    | <i>n/a</i>  | on                   | off                        | same                                                   | <i>n/a</i>                 |
| i80/s80              | <a href="#">20805</a>                 | 6761             | 41/44                                        | Blood    | ON (9)                                                                                    | <i>n/a</i>  | on                   | on                         | same                                                   | <i>n/a</i>                 |
| i76/s76              | <a href="#">20800</a>                 | 7385             | 41/44                                        | Blood    | ON (9)                                                                                    | <i>n/a</i>  | on                   | on                         | same                                                   | <i>n/a</i>                 |
| i83/s83              | <a href="#">20760</a>                 | 9160             | 41/44                                        | Blood    | OFF (8)                                                                                   | <i>n/a</i>  | off                  | off                        | same                                                   | <i>n/a</i>                 |
| i8/s8                | <a href="#">20773</a>                 | 9238             | 41/44                                        | Blood    | ON (9)                                                                                    | <i>n/a</i>  | on                   | on                         | same                                                   | <i>n/a</i>                 |
| i49/s49              | <a href="#">20791</a>                 | 1159             | UA                                           | CSF      | <i>n/a</i>                                                                                | ON (10)     | on                   | on                         | <i>n/a</i>                                             | same                       |
| i34/s34              | <a href="#">19965</a>                 | 1575             | UA                                           | Blood    | OFF (10)                                                                                  | ON (7)      | on                   | on                         | same                                                   | same                       |
| i107/s107            | <a href="#">20746</a>                 | 1867             | UA                                           | Blood    | ON (12)                                                                                   | <i>n/a</i>  | on                   | on                         | same                                                   | <i>n/a</i>                 |
| i3/s3                | <a href="#">20767</a>                 | 3280             | UA                                           | CSF      | ON (9)                                                                                    | <i>n/a</i>  | on                   | on                         | same                                                   | <i>n/a</i>                 |
| i17/s17              | <a href="#">20118</a>                 | 4051             | UA                                           | Blood    | <i>n/a</i>                                                                                | OFF (8/9)   | off                  | off                        | <i>n/a</i>                                             | same                       |
| i10/s10              | <a href="#">20776</a>                 | 5151             | UA                                           | CSF      | ON (9)                                                                                    | <i>n/a</i>  | on                   | on                         | same                                                   | <i>n/a</i>                 |
| i87/s87              | <a href="#">20801</a>                 | 5335             | UA                                           | Blood    | OFF (10)                                                                                  | OFF (12)    | off                  | off                        | same                                                   | same                       |
| i20/s20              | <a href="#">20331</a>                 | 8944             | UA                                           | Blood    | ON (9)                                                                                    | <i>n/a</i>  | on                   | on                         | same                                                   | <i>n/a</i>                 |
| i51/s51              | <a href="#">20799</a>                 | 9241             | UA                                           | CSF      | OFF (8)                                                                                   | ON (13)     | on                   | on                         | same                                                   | indeterminate <sup>e</sup> |

<sup>a</sup>Presence of at least one gene in the ON configuration (ON = at least one gene present in ON configuration; OFF = no genes in ON configuration).

<sup>b</sup>Ability to utilise Hb as sole iron source.

<sup>c</sup>Isolate contained >18 homopolymeric tract repeats.

<sup>d</sup>Poor growth on Mueller Hinton agar or uncertainty regarding growth status.

<sup>e</sup>Specimen did not yield detectable PCR products at reduced number of PCR cycles.

<sup>f</sup>Indicates whether ST is centred upon ST-269 (269) or ST-275 (275) by eBURST analysis.

<sup>g</sup>isolate/genome id on the pubmlst database ([http://pubmlst.org/perl/bigfdb/bigfdb.pl?db=pubmlst\\_neisseria\\_isolates](http://pubmlst.org/perl/bigfdb/bigfdb.pl?db=pubmlst_neisseria_isolates)).

*n/a* = not applicable (*hmbR*/*hpuA*)

same = same as that of corresponding isolate.
